# Supplementary material
Source: PubMed Central journal article supplement (PMC6776997)
Supplement: NIHMS1537750-supplement-4.pdf [file NIHMS1537750-supplement-4.pdf]

**Developmental Cell, Volume 50**

**Supplemental Information**

**Prevention and Reversion**

**of Pancreatic Tumorigenesis**

**through a Differentiation-Based Mechanism**

**Nathan M. Krah, Shuba M. Narayanan, Deanne E. Yugawa, Julie A. Straley, Christopher V.E. Wright, Raymond J. MacDonald, and L. Charles Murtaugh**

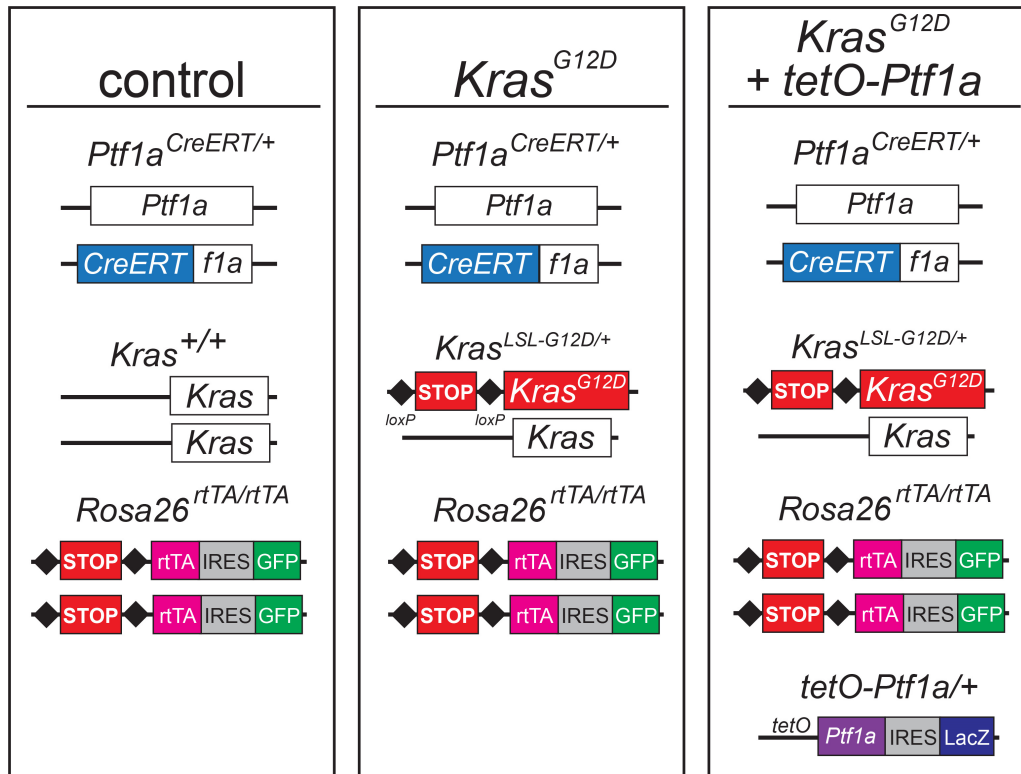

**Figure S1. Related to Figure 2. Mouse alleles utilized in this study.** Schematic representations of the alleles present in the genotypes referred to, in shorthand, as Control, *Kras*<sup>G12D</sup>, and *Kras*<sup>G12D</sup> + *tetO-Ptf1a*. Function of the system is described in Figure 1.

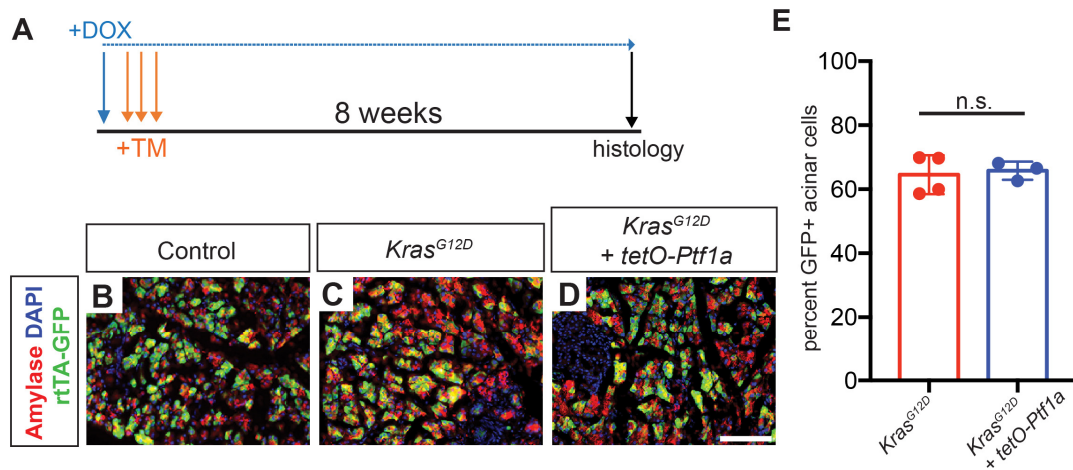

**Figure S2. Related to Figure 2. *Ptf1a<sup>CreERT</sup>* recombination efficiency following tamoxifen treatment.** (A) 6-8-week-old mice were administered tamoxifen on three consecutive days (3 x 0.25 mg/g mouse) while DOX was present in the drinking water (1 mg/ml), and pancreata were harvested after an 8-week chase. (B-D) Immunofluorescence for amylase (red) and GFP (green), reporting recombination of *R26<sup>rtTA</sup>*, on pancreata of indicated genotypes (20x, scale bar is 100 $\mu$ m). For all mice, only histologically normal areas were imaged in an effort to provide an accurate quantification of Cre-mediated recombination. (E) The proportion of GFP expression among amylase+ acinar cells were compared between *Kras<sup>G12D</sup>*, and *Kras<sup>G12D</sup> + tetO-Ptf1a* genotypes, with no significant difference found.

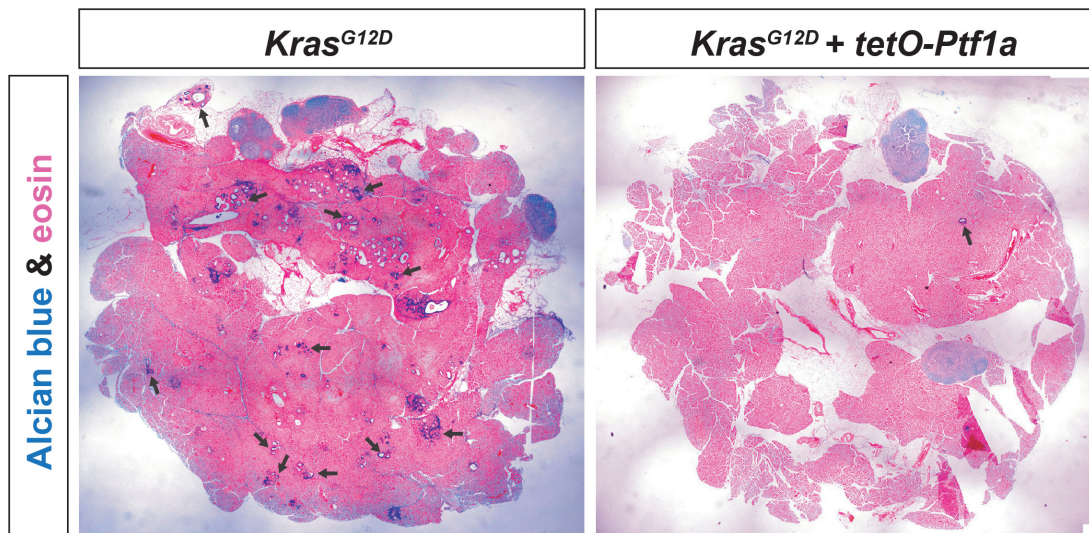

**Figure S3. Related to Figure 2.** Alcian blue staining, highlighting PanIN formation in mice of the indicated genotypes 8 weeks after TM administration. Each image is a Photomerge of 16 4x images, showing a section through the entire pancreas. Three images are quantified per mouse to yield a count of PanIN burden throughout the organ. Black arrows indicate examples of pancreatic lobules containing Alcian blue+ PanINs.

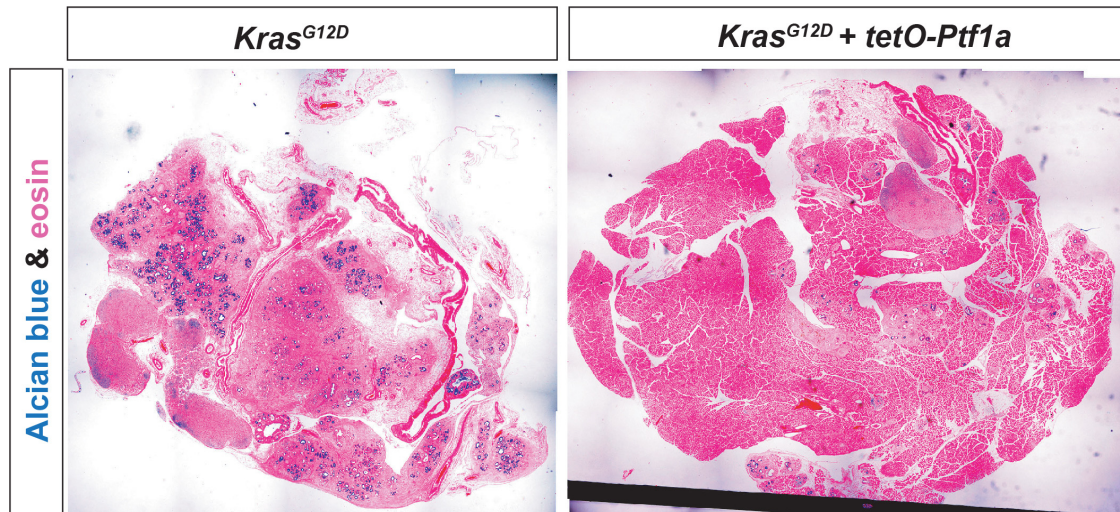

**Figure S4. Related to Figure 3.** Alcian blue staining, highlighting PanIN formation in mice of the indicated genotypes 3 weeks after caerulein treatment administration (see Figure 3 for the entire experimental schematic). Each image is a Photomerge of ~16 4x images. Three images are quantified per mouse to yield a count of PanIN burden throughout the organ.

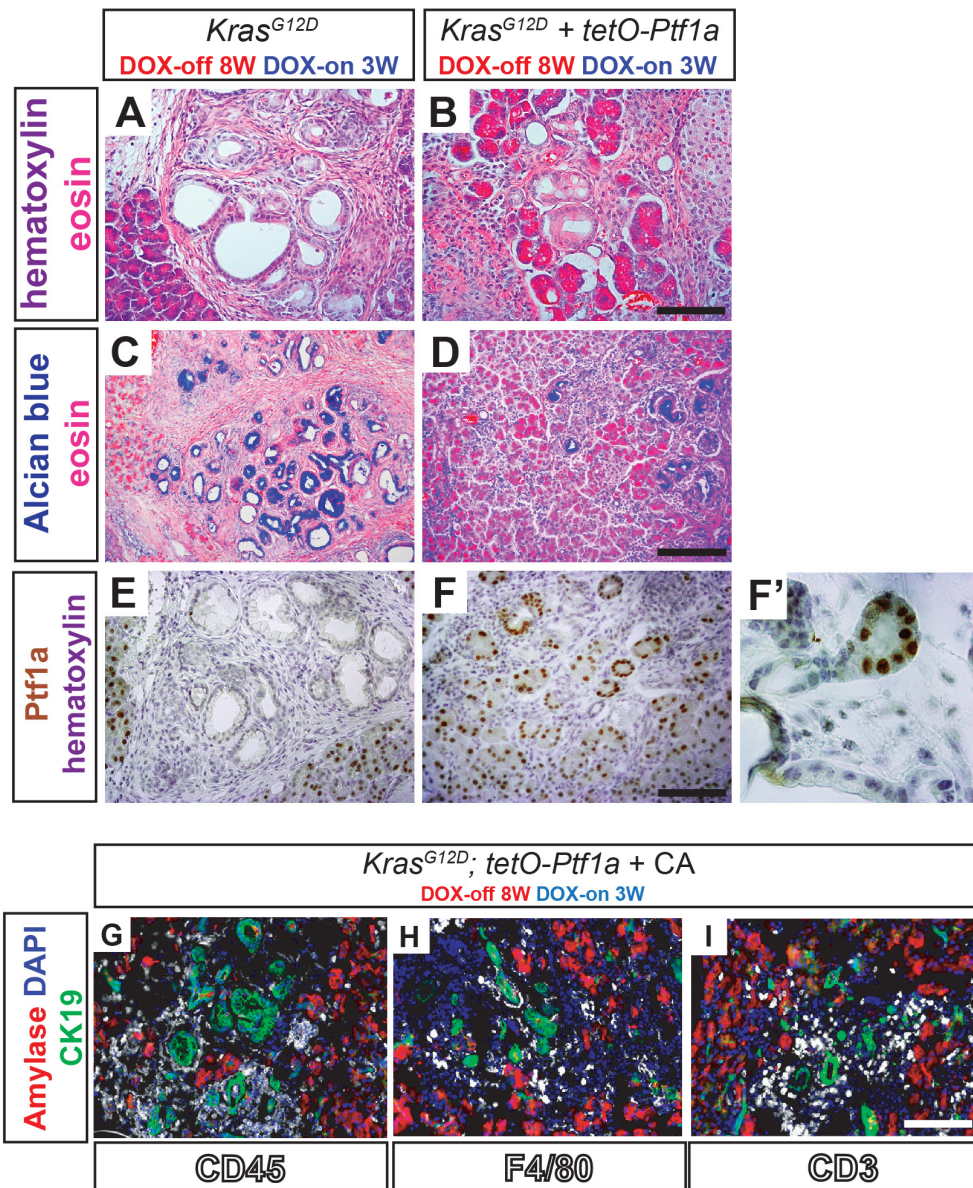

**Figure S5. Related to Figure 4. *Ptf1a* re-expression in PanINs leads to the emergence of lesion-localized acinar cells in *Kras*<sup>G12D</sup> + *tetO-Ptf1a* pancreata. (A-B) H&E (40x, scale bar is 100 $\mu$ m) and (C-D) Alcian blue (20x, scale bar is 200 $\mu$ m) staining of pancreata from mice of indicated genotypes and treatments. Eosinophilic primitive acinar cells are observed trapped within PanIN lesions of *Ptf1a* re-expressing mice. (E-F) Immunohistochemistry for *Ptf1a*, showing absence of *Ptf1a* in PanINs from *Kras*<sup>G12D</sup> pancreata and wide *Ptf1a* expression in duct-like structures in *Kras*<sup>G12D</sup> + *tetO-Ptf1a* pancreata (40x, scale bar is 100 $\mu$ m). (F') *Ptf1a*+ acinar-like cluster emerging from a ductal structure. (G-I) Immunofluorescence for Amylase, CK19, DAPI and CD45, F4/80, or CD3 in resolving areas of *Kras*<sup>G12D</sup> + *tetO-Ptf1a* pancreata (20x, scale bare is 100 $\mu$ m).**

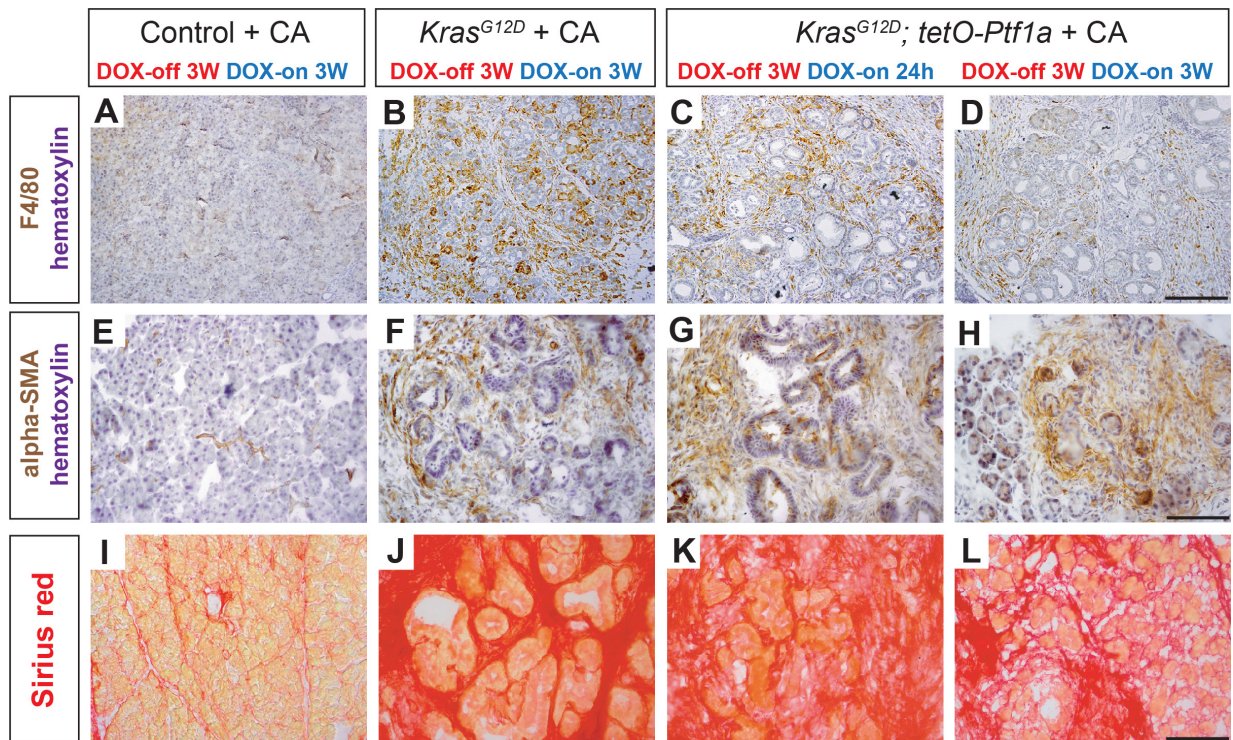

**Figure S6. Related to Figure 6. Microenvironmental changes associated with PanIN-to-acinar re-differentiation.** (A-D) Immunohistochemistry for F4/80, showing macrophage infiltration in *Kras*<sup>G12D</sup> and *Kras*<sup>G12D</sup> + *tetO-Ptfla* pancreata (20x, scale bar is 200µm). Black arrow shows a representative area of resolving *Kras*<sup>G12D</sup> + *tetO-Ptfla* pancreata 3W after DOX treatment that has few F4/80+ cells. (E-H) Immunohistochemistry for αSMA, showing fibroblast activation in *Kras*<sup>G12D</sup> and *Kras*<sup>G12D</sup> + *tetO-Ptfla* pancreata (40x, scale bar is 100µm). The arrows in H highlight an area of resolved pancreata that has few αSMA-positive cells. (I-L) Sirius red staining, highlighting areas of fibrosis in *Kras*<sup>G12D</sup> and *Kras*<sup>G12D</sup> + *tetO-Ptfla* pancreata. Re-differentiating acini are present in areas of low Sirius red staining (L, 40x, scale bar is 100µm).

**Table S1. Related to Figures 2 and 7. PCR primer sequences.**

| Target                         | Strand                   | Sequence                        | Amplicon size (bp)        |
|--------------------------------|--------------------------|---------------------------------|---------------------------|
| <b>genotyping</b>              |                          |                                 |                           |
| <i>Ptfla</i>                   | top                      | TCCAGCAAGCGGGTACTATC            | 807 (wt),<br>560 (CreERT) |
|                                | bottom (wt-specific)     | AGGCGCTTTTCGTAGGGTAG            |                           |
|                                | bottom (CreERT-specific) | TAAGCAATCCCCAGAAATGC            |                           |
| <i>Kras<sup>LSL-G12D</sup></i> | top                      | AGCTAGCCACCATGGCTTGAGTAAGTCTGCA | 597                       |
|                                | bottom                   | CCTTTACAAGCGGCAGACTGTAGA        |                           |
| <i>R26R<sup>rtTA</sup></i>     | top                      | AAAGTCGCTCTGAGTTGTTAT           | 317 (wt),<br>235 (rtTA)   |
|                                | bottom (wt-specific)     | GAAAGACCGCGAAGAGTTTG            |                           |
|                                | bottom (rtTA-specific)   | TAAGCCTGCCCAGAAGACTC            |                           |
| <i>tetO-Ptfla</i>              | top                      | TTGACCTCCATAGAAGACACCGG         | 257                       |
|                                | bottom                   | CGCGGTAGCAGTATTCGTGTAGC         |                           |
| <b>RT-PCR</b>                  |                          |                                 |                           |
| <i>PPIA</i><br>(cyclophilin A) | top                      | CCCACCGTGTTCTTCGACATT           | 275                       |
|                                | bottom                   | GGACCCGTATGCTTTAGGATGA          |                           |
| <i>CPAI</i>                    | top                      | CGCTCCACCGACACTTTTAAC           | 139                       |
|                                | bottom                   | AAATGGGACGCCCTTCATAGG           |                           |
| <i>PRSSI</i>                   | top                      | AGCCAGGCTAAGTGTGAAGC            | 100                       |
|                                | bottom                   | AATCACCCCTGACATGAATCCTTG        |                           |
| <i>AMY2A</i>                   | top                      | AATACACAACAAGGACGGACATC         | 102                       |
|                                | bottom                   | TCCAAATCCCTTCGGAGCTAAA          |                           |
| <i>CELA2A</i>                  | top                      | ACCCCACTTACCCACCTTATG           | 227                       |
|                                | bottom                   | CTCCGCAACGTAGAGGTTGT            |                           |
